# Supplementary material
Source: publisher figshare collection journal article supplement (https://wiley.figshare.com/articles/dataset/_/3568377)
Supplement: Supplementary file 1 [file 1 › appendix-E.htm]

Ecological Archives M084-002-A5


*Ecological Archives* M084-002-A5

Chun-Huo Chiu, Lou Jost, Anne Chao. 2014. Phylogenetic beta diversity, similarity, and differentiation measures based on Hill numbers. *Ecological Monographs* 84:21–44. http://dx.doi.org/10.1890/12-0960.1

Appendix E. Mathematical flaws in the traditional additive approach based on generalized entropy excess or phylogenetic generalized entropy excess.

> View / download PDF.


---

[Back to M084-002]
